# Supplementary material for: Heterostructure consists of monolayer MoS2 and arsenene with novel electronic and optical conductivity
Source: Royal Society of Chemistry journal article supplement (doi:10.1039/c6ra04277e), 2016-01-01
Supplement: c6ra04277e1.pdf [file c6ra04277e1.pdf]

## Supplementary Information

Heterostructure consists of monolayer MoS<sub>2</sub> and arsenene with novel electronic and optical conductivity

Jie Su, Liping Feng, Zhengtang Liu

*State Key Lab of Solidification Processing, College of Materials Science and Engineering, Northwestern Polytechnical University, Xi'an, Shaanxi, 710072, China*

Email: [sujie0105@126.com](mailto:sujie0105@126.com)

Table S1 The adsorption edge values of As-MoS<sub>2</sub> heterostructures with different interlayer distance.

|                            |      |      |      |      |      |      |      |      |      |
|----------------------------|------|------|------|------|------|------|------|------|------|
| Interlayer distance<br>(Å) | 2.0  | 2.2  | 2.5  | 3.0  | 3.2  | 3.5  | 3.6  | 3.7  | 4.0  |
| Adsorption edge<br>(eV)    | 1.03 | 1.04 | 1.06 | 1.16 | 1.27 | 1.34 | 1.39 | 1.47 | 1.53 |
